# Supplementary material for: Mesoscopic magnetic iron oxide spheres for high performance Li-ion battery anode: a new pulsed laser induced reactive micro-bubble synthesis process
Source: Royal Society of Chemistry journal article supplement (doi:10.1039/c3ta12790g), 2013-01-01
Supplement: c3ta12790g.pdf [file c3ta12790g.pdf]

# Mesoscopic Magnetic Iron Oxide spheres for high performance Li-ion battery anode: A new pulsed laser induced reactive micro-bubble synthesis process

Mandakini Biswal,<sup>a</sup> Anil Suryawanshi,<sup>a</sup> Vishal Thakare,<sup>a</sup> Samuel Jouen,<sup>b</sup> Beatrice Hannoyer,<sup>b</sup> Vanchiappan Aravindan,<sup>c</sup> Srinivasan Madhavi,<sup>c</sup> Satishchandra Ogale<sup>\*a</sup>

## Electronic Supplementary Information

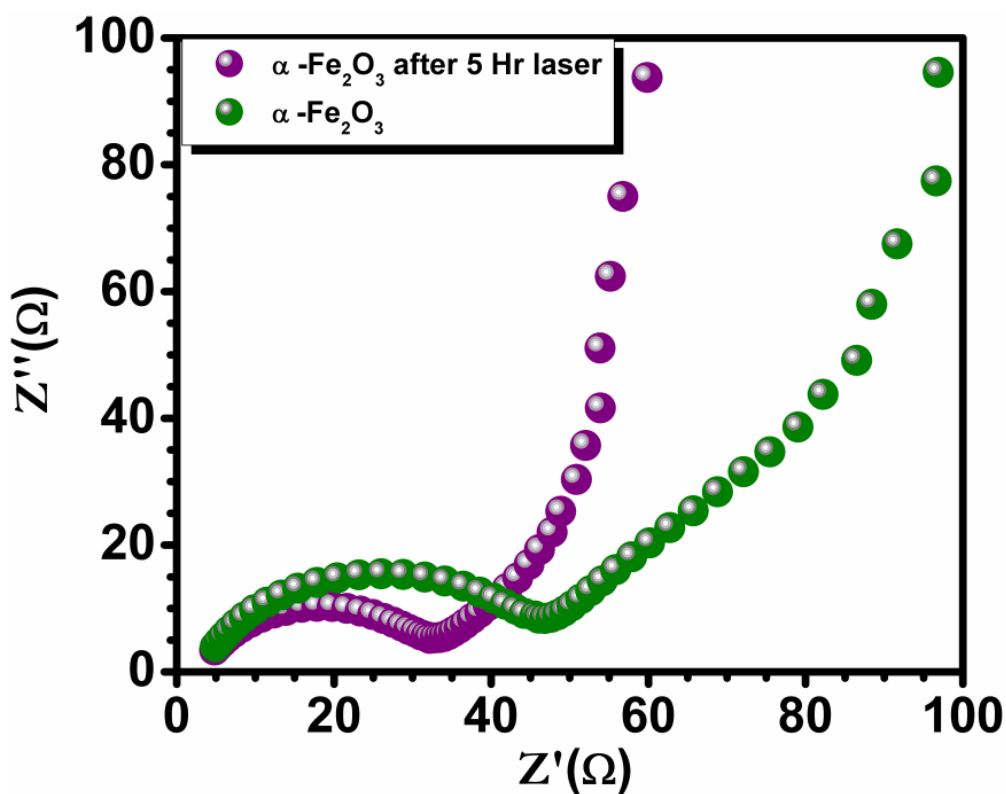

**Fig S1:** ac Impedance spectra of bulk  $\alpha\text{-Fe}_2\text{O}_3$  and  $\alpha\text{-Fe}_2\text{O}_3$  after 5 h laser irradiation. The figure shows the comparison of conductivity of  $\alpha\text{-Fe}_2\text{O}_3$  and  $\alpha\text{-Fe}_2\text{O}_3$  after 5Hr laser showing higher conductivity in the later case.

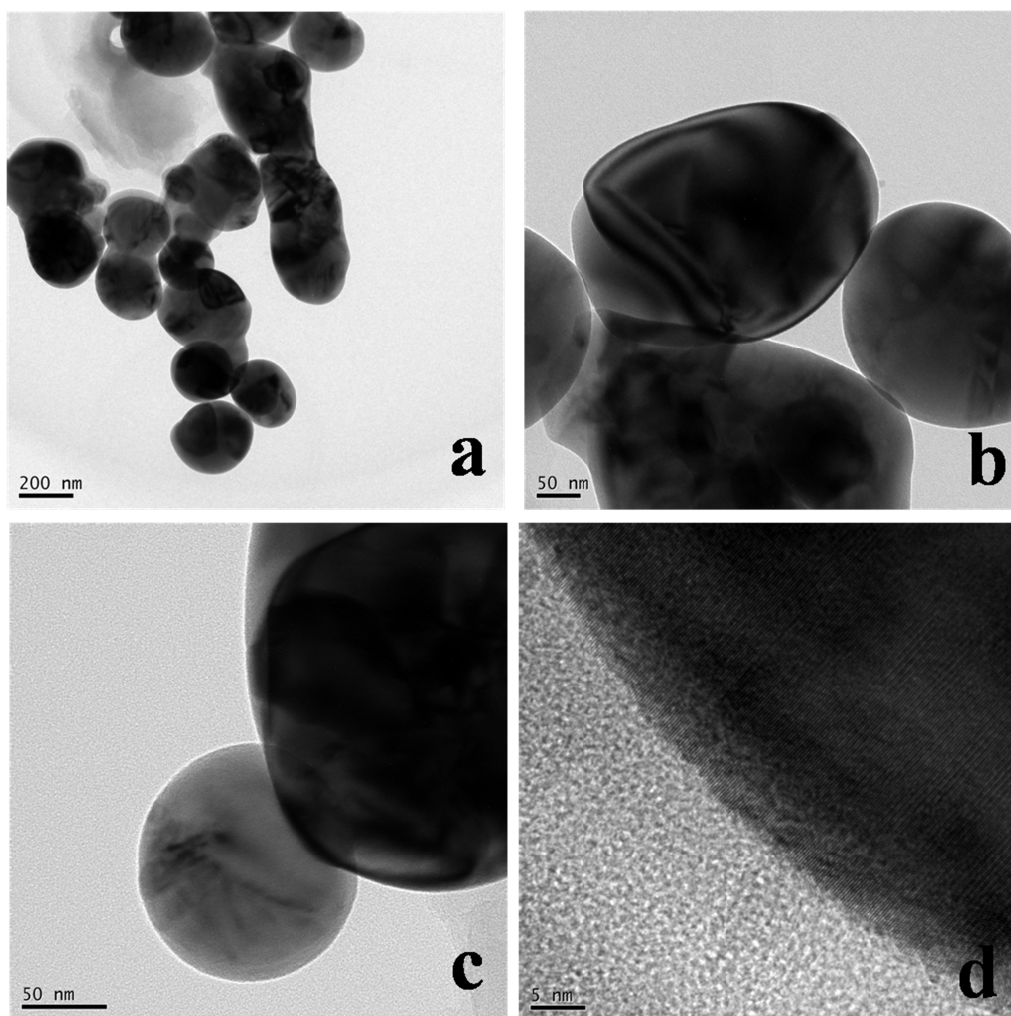

**Fig. S2:** a-c) HR-TEM images of iron oxides used for electrochemical measurements as electrode materials in Li ion battery. The figure shows that the morphology is intact even after several cycles of charge and discharge measurements.
